# Supplementary material for: Experimental Investigation on Floating Solar-Driven Membrane Distillation Desalination Modules
Source: MDPI journal article supplement (doi:10.3390/membranes11050304), 2021-04-21
Supplement: s1 [file s1]

*Supplementary materials*

# Experimental investigation on floating solar-driven membrane distillation desalination modules

Qingxiu Miao, Yaoling Zhang, Shuo Cong, and Fei Guo\*

School of Energy and Power Engineering, Dalian University of Technology, Dalian 116024, China

\* Correspondence: feiguo@dlut.edu.cn

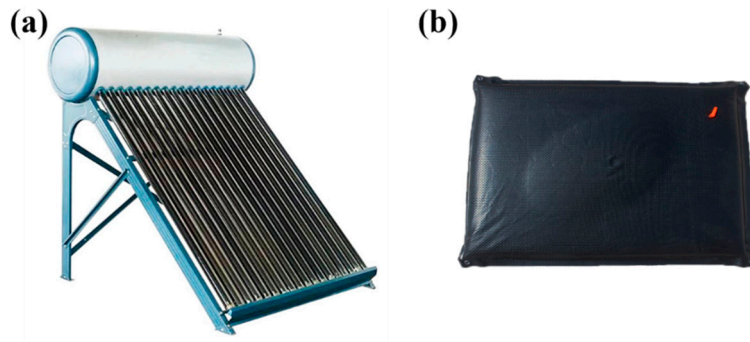

**Figure S1.** Two ways of heating the sea water. (a) heat pipe solar collector; (b) solar heating bag.

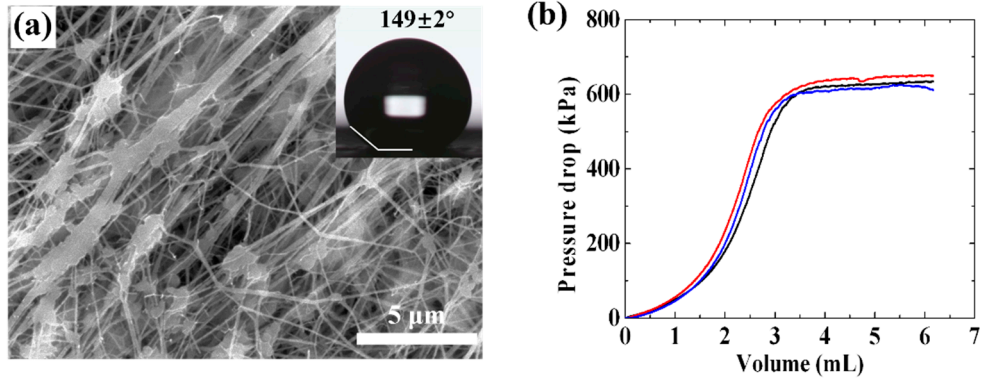

**Figure S2.** (a) Membrane morphology (pore size:  $0.22 \mu\text{m}$ ) and contact angle; (b) LEP measurements of the membranes. The test was repeated three times.

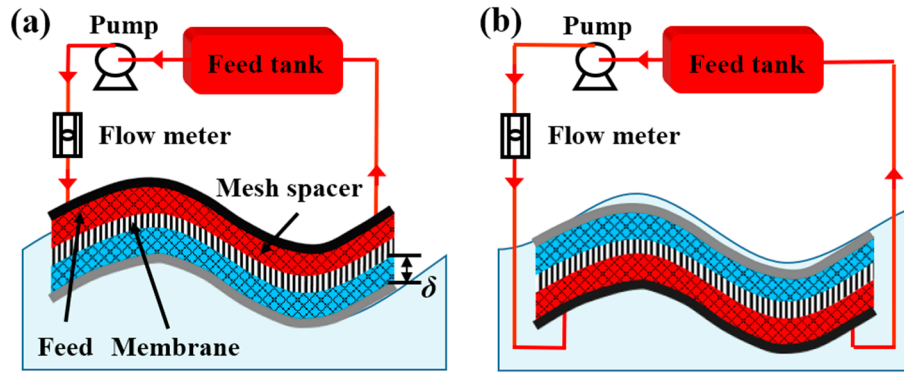

**Figure S3.** Schematics of varied configuration to compare the performance of upward evaporation and downward evaporation: (a) upward evaporation MD configuration; (b) downward evaporation MD configuration.

**Table S1.** Salt rejection ratio of the simplest MD configuration.

| Feed temperature (°C) | $\delta$ (mm) | R (%) |
|-----------------------|---------------|-------|
| 61                    | 2             | 99.89 |
|                       | 4             | 99.79 |
|                       | 6             | 99.75 |
|                       | 8             | 99.90 |
| 32                    | 4             | 99.98 |
| 35                    |               | 99.97 |
| 43                    |               | 99.60 |
| 60                    |               | 99.79 |

**Table S2.** Salt rejection ratio of downward evaporation verified configuration.

| Feed temperature (°C) | Q (L/min) | R (%) |
|-----------------------|-----------|-------|
| 35                    | 1.2       | 99.82 |
| 43                    |           | 99.79 |
| 48                    |           | 99.77 |
| 61                    |           | 99.85 |
| 60                    | 0.4       | 99.96 |
|                       | 0.8       | 99.98 |
|                       | 1.2       | 99.93 |

**Table S3.** Salt rejection ratio of upward evaporation verified configuration.

| Feed temperature (°C) | Q (L/min) | R (%) |
|-----------------------|-----------|-------|
| 32                    | 1.2       | 99.74 |
| 39                    |           | 99.73 |
| 49                    |           | 99.84 |
| 61                    |           | 99.77 |
| 60                    | 0.4       | 99.89 |
|                       | 0.8       | 99.88 |
|                       | 1.2       | 99.78 |

**Table S4.** Salt rejection ratio of the optimal MD configuration.

| <b>Feed temperature (°C)</b> | <b><i>R</i> (%)</b> |
|------------------------------|---------------------|
| 32                           | 99.99               |
| 38                           | 99.90               |
| 50                           | 99.79               |
| 62                           | 99.78               |
